# Supplementary material for: The catalytically inactive tyrosine phosphatase HD-PTP/PTPN23 is a novel regulator of SMN complex localization
Source: PubMed Central journal article supplement — Mol Biol Cell. 2015 Jan 15;26(2):161–71. doi: 10.1091/mbc.E14-06-1151 (PMC4294665; doi:10.1091/mbc.e14-06-1151), 2015-01-15

# Supplemental Materials

*Molecular Biology of the Cell*

Husedzinovic et al.

**Table S1:****Primary hits of protein phosphatases scoring in the systematic screen for regulators of SMN function and localisation**

Gene products identified as potential SMN regulators in the automated screen (left) as well as additional gene products identified by visual inspection (right). The identified genes are sorted according to the relative increase (%) in the proportion of cells showing no SMN accumulation in CB compared to the control (deviation from threshold, see methods for details). Serine/threonine phosphatases (PPM1G is indicated in bold font) are marked in yellow, tyrosine phosphatases (PTPN23: bold) in blue and dual specificity phosphatases in green. The list also indicates positions (plate and well) in the screen. The PPP1CC/PP1 regulatory subunits PPP1R8/NIPP1 (*italics*) was the only gene products whose knockdown caused cytoplasmic SMN accumulations.

**Supplementary Figure 1:****Subcellular distribution of SMN after genome-wide knockdown of human phosphatases**

72h after cell seeding and inverse siRNA transfection in 96well plates, HeLa cells were fixed and immunostained using an  $\alpha$ -SMN antibody; nuclei were stained using DAPI. An Olympus ScanR High-content Screening Station was used to analyse the subcellular distribution of the SMN protein. Images were collected using a 10x objective. Insets show sections displayed in Figure 1. Scalebar: 120 $\mu$ m.

Husedzinovic et al., Table S1

| Plate        | well       | Gene          | Number of cells without spots (%) | Deviation from treshold |
|--------------|------------|---------------|-----------------------------------|-------------------------|
| pB1_1        | F7         | PPEF2         | 78,37023                          | 35,975563               |
| pA1_1        | E8         | PPP1R12B      | 80,39726                          | 35,90111                |
| pC1_2        | C4         | PTPRM         | 62,63628                          | 32,541802               |
| pC1_2        | A5         | PPP3R2        | 61,70373                          | 31,609252               |
| pC1_3        | B6         | PPP1R14D      | 77,02968                          | 31,25886                |
| pA1_2        | A5         | PPP3R2        | 64,15741                          | 30,130764               |
| <b>pB1_1</b> | <b>F11</b> | <b>PPM1G</b>  | <b>68,39782</b>                   | <b>26,003153</b>        |
| pB1_1        | C5         | CDC25C        | 66,71887                          | 24,324203               |
| pA1_1        | A8         | PPP1CC        | 68,02212                          | 23,52597                |
| pA1_4        | B11        | C3orf48       | 74,40848                          | 23,160345               |
| pA1_1        | E9         | NAP1L1        | 66,43797                          | 21,94182                |
| pA1_3        | D10        | DUSP16        | 77,05556                          | 20,49891                |
| pB1_1        | C3         | CDC25A        | 56,84                             | 14,445333               |
| pA1_1        | H5         | PPP2R3A       | 57,07415                          | 12,578                  |
| pA1_2        | A3         | PPP3CB        | 45,49464                          | 11,467994               |
| pC1_1        | F8         | PPEF1         | 77,58797                          | 11,46349                |
| pB1_2        | B8         | PTPRD         | 45,16382                          | 10,24404                |
| pA1_3        | B5         | PPP1R12C      | 66,66421                          | 10,10756                |
| <b>pC1_2</b> | <b>H11</b> | <b>PTPN23</b> | <b>39,66659</b>                   | <b>9,572112</b>         |
| pB1_2        | B3         | PTPN11        | 43,74117                          | 8,82139                 |
| pB1_1        | E9         | NAP1L1        | 50,19887                          | 7,804203                |
| pB1_2        | B1         | PTPN7         | 41,33023                          | 6,41045                 |
| pB1_4        | C6         | LOC283871     | 48,33502                          | 5,22834                 |
| pC1_3        | G1         | PPTC7         | 46,24538                          | 0,47456                 |

| Plate | well | Gene   |
|-------|------|--------|
| pA1_1 | C8   | DUSP2  |
| pC1_1 | D2   | DUSP7  |
| pC1_1 | C4   | CDC25B |
| pC1_2 | F3   | CTDP1  |
| pC1_1 | G9   | PPP1R8 |

A

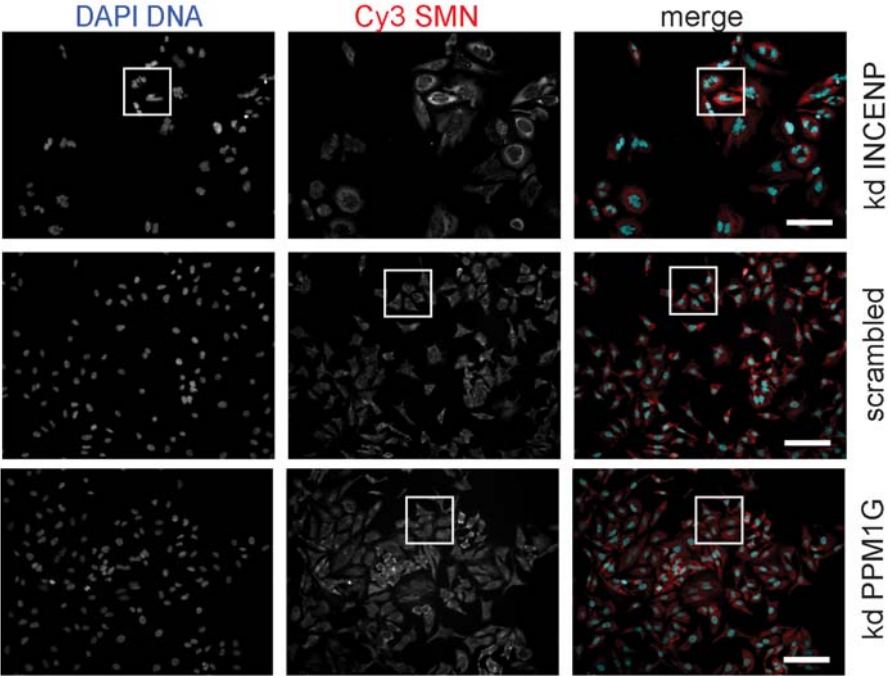

B

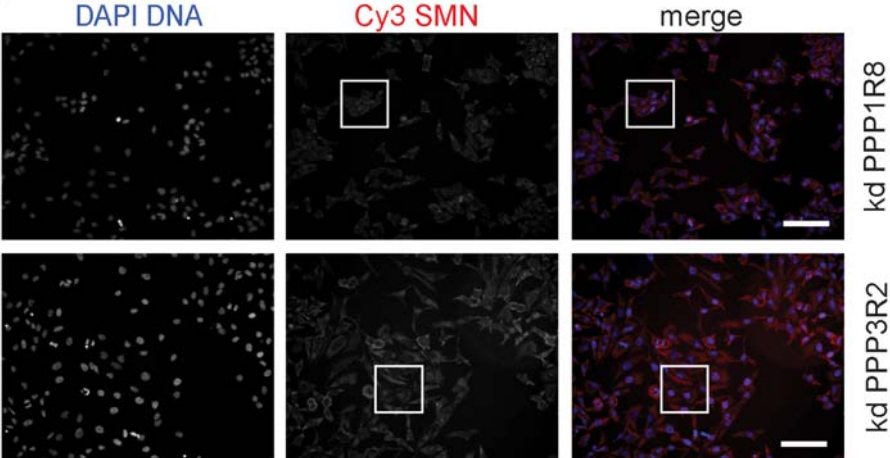

Supplement: supp_E14-06-1151_CombinedSupMats.pdf [file supp_E14-06-1151_CombinedSupMats.pdf]
